# Supplementary material for: Performance of the Framingham risk models and pooled cohort equations for predicting 10-year risk of cardiovascular disease: a systematic review and meta-analysis
Source: BMC Med. 2019 Jun 13;17:109. doi: 10.1186/s12916-019-1340-7 (PMC6563379; doi:10.1186/s12916-019-1340-7)
Supplement: Supplementary file 14 — Dataset. Dataset used for analyses. (CSV 166 kb) [file 12916_2019_1340_MOESM14_ESM.csv]

	Author	Year	Journal	Framingham_version2	Studydesign	Year_start_recruitment	Year_end_recruitment	Year_end_followup	Cohort	Country	Continent	Number_of_centers	Eligibility_age_lower	Eligibility_age_upper	Eligibility_age_cat2	Eligibility_free_of_CHD	Eligibility_free_of_diabetes	Eligibility_free_of_AF	Eligibility_free_of_cancer	Eligibility_free_of_majordisease	Eligibility_antihypertensives	Eligibility_lipidloweringdrugs	treated.cvd	FU_median	Predictionhorizon	Predictionhorizon_cat	age_mean_final	age_sd_final	SBP_mean_final	SBP_sd_final	HDL_mean_final	HDL_sd_final	Totalcholesterol_mean_final	Totalcholesterol_sd_final	Gender_men	Smoking_current	Diabetes	Numberofparticipants_analysis	Numberofevents_analysis	Outcome_category	Outcome_definition	OUTCO5	OUTCO6	OUTCO7	Cstatistic	c.95.LB	c.95.UB	se.c.final	OE_final
11	Empana	2003	European Heart Journal	Wilson men LDL cholesterol	Existing cohort	1991	1993	NA	PRIME study	Northern Ireland	Europe	Population based	50	59	Narrower	1	0	0	0		0	0	0	NA	5	<10 year	NA	2.25	NA	NA	NA	NA	NA	NA	100	NA	NA	2399	120	Fatal or nonfatal CHD	Coronary death, myocardial infarction and angina pectoris. Definite coronary death was defined as death with a documented coronary event. Sudden death was defined as death occurring within one hour following symptoms without explanation. However, when sig	nificant coronary atheroma was present at autopsy, the death was considered as definite coronary. When a coronary death was supsected, with no other documentation or explanation, it was labelled possible coronary death. The three categroies were grouped t	ogether as coronary deaths. Hard coronary cases were subjects whoe had at least one nonfatal MI event or who died from coronary disease during follow-up.		0.66	0.608758955001238	0.707751774647951	0.0253246489547691	0.760742119441128
12	Empana	2003	European Heart Journal	Wilson men LDL cholesterol	Existing cohort	1991	1993	NA	PRIME study	France	Europe	Population based	50	59	Narrower	1	0	0	0		0	0	0	NA	5	<10 year	NA	2.25	NA	NA	NA	NA	NA	NA	100	NA	NA	7359	197	Fatal or nonfatal CHD	Coronary death, myocardial infarction and angina pectoris. Definite coronary death was defined as death with a documented coronary event. Sudden death was defined as death occurring within one hour following symptoms without explanation. However, when sig	nificant coronary atheroma was present at autopsy, the death was considered as definite coronary. When a coronary death was supsected, with no other documentation or explanation, it was labelled possible coronary death. The three categroies were grouped t	ogether as coronary deaths. Hard coronary cases were subjects whoe had at least one nonfatal MI event or who died from coronary disease during follow-up.		0.68	0.641329977151499	0.716344821437004	0.019165508833262	0.42222332062184
17	Mainous	2007	American Journal of Cardiology	Wilson men Total cholesterol	Existing cohort	1987	1989	1998	ARIC study	United States	North America	Population based	45	64	Narrower	1	0	0	0		0	0	0	NA	10	10 year	54.4	5.7	122.8	16.8	44.5	10.7	210.7	37.3	100	27.5	6.2	6239	NA	Fatal or nonfatal CHD	CHD: myocardial infarction, fatal CHD, or cardiac procedure				0.691	0.669589839287295	0.711620315361474	0.0107269326776726	NA
31	Buitrago	2011	Annals of Family Medicine	Wilson men Total cholesterol	Existing cohort	1994	2004	NA	Patients ascribed to the La Paz healthcare centre in Badajoz, Spain	Spain	Europe	NR	35	74	Comparable - within 5 yrs	2	1	0	0		1	1	1	NA	10	10 year	50.9	9.8	130.7	16.6	47.3	13.2	239.3	34.1	100	44.8	0	201	22	Fatal or nonfatal CHD	angina and myocardial infarction, fatal and nonfatal				0.63	0.505730415294954	0.739141442112917	0.060569625565225	0.67284
33	Comin	2007	Revista Espanola de Cardiologia	Wilson men Total cholesterol	Existing cohort	1995	1998	NA	Patients from 67 health centers in autonomous Spanish regions	Spain	Europe	Multicenter	35	74	Comparable - within 5 yrs	2	0	0	0		0	0	0	5	5	<10 year	55.7	10.6	135	18	49	14	229	41	100	43.8	18.8	2447	137	Fatal or nonfatal CHD	angina, fatal/non-fatal MI				0.679281	0.632540750485469	0.722682485485027	0.023046	0.387463172545176
36	Ferrario	2005	International Journal of Epidemiology	Wilson men Total cholesterol	Combination of existing cohorts	1983	1996	1998	CUORE study	Italy	Europe	Multicenter	35	69	Comparable - within 5 yrs	1	0	0	0		0	0	0	9.1	10	10 year	50.8	9.2	138.5	20.5	50.2	13.9	224.7	43.7	100	38.7	5.3	6865	312	Fatal or nonfatal CHD	Coronary death (MI, sudden cardiac death), nonfatal MI, coronary revascularization, silent MI				0.723	0.664531675085791	0.774732361114167	0.0281847418901044	0.37421
37	Lloyd-Jones	2004	American Journal of Cardiology	Wilson men Total cholesterol	Existing cohort	1971	NA	1996	Framingham Heart Study	Framingham	North America	Population based	40	94	Older	1	0	0	0		0	0	0	NA	10	10 year	NA	13.5	NA	NA	NA	NA	NA	NA	100	NA	NA	2716	NA	Fatal or nonfatal CHD	Angina pectoris, coronary insufficiency, MI, death due to CHD.				NA	NA	NA	NA	NA
41	Rodondi	2012	PLoS ONE	Wilson men Total cholesterol	Existing cohort	1997	1998	1997	Health ABC Study	United States	North America	Population based	70	79	Narrower	2	0	0	0		0	0	0	8.3	7.5	<10 year	73.613	2.86	135.6	20.6	48.5	14.5	193.7	34.9	100	11	15	981	205	Fatal or nonfatal CHD	nonfatal myocardial infarction or coronary death (corresponding to ‘‘hard’’ events, as defined in the current FRS [5]), and hospitalization for angina or revascularization (coronary angioplasty or surgery)				0.583	0.535343233537613	0.629154851284481	0.024	1.08322371168276
43	Simmons	2008	Archives of Internal Medicine	Wilson men Total cholesterol	Existing cohort	1993	1998	2005	EPIC-Norfolk	United Kingdom	Europe	Multicenter	40	79	Narrower	1	0	0	0		0	0	0	NA	10	10 year	58.3	9.7	136.8	17	50	12	232	42	100	12.2	3.4	4513	430	Fatal or nonfatal CHD	CHD defined by ICD codes below. "These codes encompass the clinical spectrum of CHD (eg, unstable angina, stable angina, and myocardial infarction)."				0.71	0.689574461206369	0.729608557502607	0.0102165714893165	0.546185737040091
47	Vaidya	2007	American Journal of Cardiology	Wilson men Total cholesterol	Existing cohort	1983	1996	2005	10 Baltimore area hospitals	United States	North America	Multicenter	30	59	Narrower	1	0	0	1	autoimmune disease, life-threatening diseases	0	0	0	NA	10	10 year	45.2	7.3	131.7	16.8	44.6	12.8	232.8	42.1	100	31.3	6.4	404	81	Fatal or nonfatal CHD	"For this study, total events included all CAD events as defined in the Framingham Heart Study, using the same classifications and definitions."				0.6975	0.636343045732223	0.75237431057602	0.0297	1.70103092783505
58	Marrugat	2007	Journal of Epidemiology & Community Health	Wilson men Total cholesterol	Combination of existing cohorts	1995	1998	NA	VERIFICA study	Spain	Europe	Multicenter	35	74	Comparable - within 5 yrs	1	0	0	0		0	0	0	NA	5	<10 year	55.7	10.6	135	17.8	48.5	13.6	228.8	40.5	100	43.8	18.8	2447	98	Fatal or nonfatal CHD	Fatal or non-fatal AMI, angina pectoris, unrecognised AMI				0.68	0.631431052204284	0.724956552218513	0.023915	0.4065557118019
61	Reissigova	2007	Methods of Information in Medicine	Wilson men Total cholesterol	Existing cohort	1975	1979	NA	Primary Prevention Study of Atherosclerotic Risk Factors (STULONG)	Czech Republic	Europe	Population based	38	49	Narrower	2	1	0	0	serious disease not enabling a long-term follow-up	0	0	0	NA	10	10 year	51.2	3.7	133.06	17.66	53.51	14.02	225.01	39.89	100	51.1	0	646	83	Fatal or nonfatal CHD	angina pectoris, recognized and unrecognized myocardial infarction, coronary insufficiency and CHD death including fatal myocardial infarction and sudden cardiac death				0.638	0.582707609728909	0.689865325553632	0.0274314088467673	0.217156105
62	D'Agostino	2001	JAMA	Wilson men Total cholesterol	Existing cohort	1987	1988	NA	ARIC study	United States	North America	Population based	44	66	Narrower	0	0	0	0		0	0	0	NA	5	<10 year	54.6	5.5	NA	NA	43.4	10.3	210.4	36.4	100	24	6	4705	149	Fatal or nonfatal CHD	Hard CHD: coronary death or myocardial infarction				0.75	0.708338466895132	0.787495841763711	0.0202121408202074	0.930929431342075
63	D'Agostino	2001	JAMA	Wilson men Total cholesterol	Existing cohort	1987	1988	NA	ARIC study	United States	North America	Population based	44	66	Narrower	0	0	0	0		0	0	0	NA	5	<10 year	53.7	5.5	NA	NA	48.7	11.5	212.6	39.5	100	38	14	1428	46	Fatal or nonfatal CHD	Hard CHD: coronary death or myocardial infarction				0.67	0.587123352032653	0.743508381936517	0.0401701468982768	0.89524314158009
64	D'Agostino	2001	JAMA	Wilson men Total cholesterol	Nested case-control	1982	1982	NA	Physicians Health Study	United States	North America	Population based	40	74	Narrower	2	0	0	1	renal or liver disease, peptic ulcer or gout	0	0	1	NA	5	<10 year	57.6	8.5	NA	NA	46.4	11.3	221.5	38.5	100	16	5	901	182	Fatal or nonfatal CHD	Hard CHD: coronary death or myocardial infarction				0.63	0.583971172613103	0.673781080222843	0.0229674558114532	NA
65	D'Agostino	2001	JAMA	Wilson men Total cholesterol	Existing cohort	1980	1982	NA	Honolulu Heart Program	United States	North America	NR	51	81	Older	0	0	0	0		0	0	0	NA	5	<10 year	61.9	7.5	NA	NA	46.1	10.7	217.1	35.4	100	32	14	2755	77	Fatal or nonfatal CHD	Hard CHD: coronary death or myocardial infarction				0.72	0.659162821520061	0.773706105611306	0.0293035795218669	0.466016624380445
66	D'Agostino	2001	JAMA	Wilson men Total cholesterol	Existing cohort	1965	1968	NA	Puerto Rico Heart Health Program	Puerto Rico	North America	Population based	35	74	Comparable - within 5 yrs	0	0	0	0		0	0	0	NA	5	<10 year	54.1	9.75	NA	NA	43.3	4.3	203	37.2	100	44	7	8713	107	Fatal or nonfatal CHD	Hard CHD: coronary death or myocardial infarction				0.69	0.637843184886184	0.73773387958237	0.0255484067247335	0.352057100584528
67	D'Agostino	2001	JAMA	Wilson men Total cholesterol	Existing cohort	1989	1991	NA	Strong Heart Study	United States	North America	Population based	45	75	Narrower	0	0	0	0		0	0	0	NA	5	<10 year	55.4	7.5	NA	NA	43	10.4	192.2	33.1	100	40	42	1527	46	Fatal or nonfatal CHD	Hard CHD: coronary death or myocardial infarction				0.69	0.608187161779189	0.761430859232754	0.0393336896793448	0.69774084490416
68	D'Agostino	2001	JAMA	Wilson men Total cholesterol	Existing cohort	1989	1990	NA	Cardiovascular Health Study	United States	North America	Population based	65	74	Narrower	0	0	0	0		0	0	0	NA	5	<10 year	69.7	2.25	NA	NA	47.5	10.5	200.4	33.4	100	12	15	956	71	Fatal or nonfatal CHD	Hard CHD: coronary death or myocardial infarction				0.63	0.560983192117048	0.694083563851042	0.0341400600919455	NA
75	Suka	2001	Hypertension Research - Clinical & Experimental	Wilson men Total cholesterol	Existing registry	1991	1993	1998	Employee health management center in a Japanese company	Japan	Asia	Single center	30	59	Narrower	2	0	0	0		0	0	0	NA	NA	NR	44.7	4.5	129	17.1	50.271	15.468	197.217	34.803	100	59.8	8.5	5611	80	Fatal or nonfatal CHD	Angina pectoris, myocardial infarction or conary insufficiency diagnosed an treated in a hospital				0.71	0.650264009839815	0.763247705320666	0.028908376142425	NA
88	DeFilippis	2015	Ann Intern Med	Wilson men Total cholesterol	Existing cohort	2000	2002	NA	MESA study	United States	North America	Multicenter	50	74	Narrower	2	1	0	1	serious disease not enabling a long-term follow-up	0	0	0	NA	10	10 year	61.5	7.1	126	21	52	15	197	35	100	14	0	1961	164	Fatal or nonfatal CHD	Myocardial infarction, death from CHD, and angina				0.69	0.649503178751049	0.727778863880674	0.02	0.640058055152395
91	Jee	2014	BMJ Open	Wilson men Total cholesterol	Existing cohort	1996	2001	2011	Korean Heart Study	South Korea	Asia	Multicenter	30	74	Comparable - within 5 yrs	2	0	0	1	liver disease or respiratory disease	0	0	0	11.6	10	10 year	45.8	9.4	123.3	16.7	47.9	10.6	194.5	34.8	100	53	8.4	164005	2086	Fatal or nonfatal CHD	Hard CHD: acute myocardial infarction, sudden death and other coronary deaths				NA	NA	NA	NA	NA
104	Ryckman	2015	Abdom Imaging	Wilson men Unclear	Existing cohort	2004	2005	NA	Series of adults undergoing colorectal cancer screening	United States	North America	NR	NA	NA	NR	1	0	0	0		0	0	0	NA	NA	NR	NA	NA	NA	NA	NA	NA	NA	NA	100	NA	NA	NA	NA	Fatal or nonfatal CHD	myocardial infarction or any coronary artery procedure leading to intervention (e.g., coronary artery bypass, stenting, or angioplasty)				NA	NA	NA	NA	NA
18	Mainous	2007	American Journal of Cardiology	Wilson women Total cholesterol	Existing cohort	1987	1989	1998	ARIC study	United States	North America	Population based	45	64	Narrower	1	0	0	0		0	0	0	NA	10	10 year	53.8	5.7	122.1	17.2	53.7	11.2	216.7	38.6	0	24.8	7.4	8104	NA	Fatal or nonfatal CHD	CHD: myocardial infarction, fatal CHD, or cardiac procedure				0.808	0.792024702863931	0.823022378609256	0.00790666561532722	NA
32	Buitrago	2011	Annals of Family Medicine	Wilson women Total cholesterol	Existing cohort	1994	2004	NA	Patients ascribed to the La Paz healthcare centre in Badajoz, Spain	Spain	Europe	NR	35	74	Comparable - within 5 yrs	2	1	0	0		1	1	1	NA	10	10 year	53.6	9.2	133.1	18.7	58.7	15.7	238.7	35.2	0	13.4	0	246	8	Fatal or nonfatal CHD	angina and myocardial infarction, fatal and nonfatal				0.65	0.418617796455343	0.827288151140405	0.109976432320532	0.4230769
34	Comin	2007	Revista Espanola de Cardiologia	Wilson women Total cholesterol	Existing cohort	1995	1998	NA	Patients from 67 health centers in autonomous Spanish regions	Spain	Europe	Multicenter	35	74	Comparable - within 5 yrs	2	0	0	0		0	0	0	5	5	<10 year	56.8	10.4	135	19	58	14	234	42	0	10.6	14.6	3285	86	Fatal or nonfatal CHD	angina, fatal/non-fatal MI				0.729423	0.667266491017891	0.783731633413135	0.029791	0.358999792820966
38	Lloyd-Jones	2004	American Journal of Cardiology	Wilson women Total cholesterol	Existing cohort	1971	NA	1996	Framingham Heart Study	Framingham	North America	Population based	40	94	Older	1	0	0	0		0	0	0	NA	10	10 year	NA	13.5	NA	NA	NA	NA	NA	NA	0	NA	NA	3500	NA	Fatal or nonfatal CHD	Angina pectoris, coronary insufficiency, MI, death due to CHD.				NA	NA	NA	NA	NA
42	Rodondi	2012	PLoS ONE	Wilson women Total cholesterol	Existing cohort	1997	1998	1997	Health ABC Study	United States	North America	Population based	70	79	Narrower	2	0	0	0		0	0	0	8.3	7.5	<10 year	73.41	2.84	135.8	20.7	61.1	17	213.8	38	0	9	12	1212	146	Fatal or nonfatal CHD	nonfatal myocardial infarction or coronary death (corresponding to ‘‘hard’’ events, as defined in the current FRS [5]), and hospitalization for angina or revascularization (coronary angioplasty or surgery)				0.577	0.521391305218078	0.630723687399582	0.028	2.0494931348518
44	Simmons	2008	Archives of Internal Medicine	Wilson women Total cholesterol	Existing cohort	1993	1998	2005	EPIC-Norfolk	United Kingdom	Europe	Multicenter	40	79	Narrower	1	0	0	0		0	0	0	NA	10	10 year	57.6	9.6	132.7	18.7	62	19	239	46	0	11.8	2.3	5782	250	Fatal or nonfatal CHD	CHD defined by ICD codes below. "These codes encompass the clinical spectrum of CHD (eg, unstable angina, stable angina, and myocardial infarction)."				0.71	0.679022445348801	0.739136457031871	0.0153480655454333	0.56018725508245
48	Vaidya	2007	American Journal of Cardiology	Wilson women Total cholesterol	Existing cohort	1983	1996	2005	10 Baltimore area hospitals	United States	North America	Multicenter	30	59	Narrower	1	0	0	1	autoimmune disease, life-threatening diseases	0	0	0	NA	10	10 year	46.1	7.4	134.5	13.8	56.3	12.1	232.3	52.7	0	34.7	6.1	380	27	Fatal or nonfatal CHD	"For this study, total events included all CAD events as defined in the Framingham Heart Study, using the same classifications and definitions."				0.7874	0.699412245513892	0.854972662016889	0.0397	1.14125200642055
59	Marrugat	2007	Journal of Epidemiology & Community Health	Wilson women Total cholesterol	Combination of existing cohorts	1995	1998	NA	VERIFICA study	Spain	Europe	Multicenter	35	74	Comparable - within 5 yrs	1	0	0	0		0	0	0	NA	5	<10 year	56.8	10.4	135.2	18.8	57.6	14.2	234.1	42.1	0	10.6	14.6	3285	56	Fatal or nonfatal CHD	Fatal or non-fatal AMI, angina pectoris, unrecognised AMI				0.73	0.666966548730613	0.784949786362116	0.030181	0.395471381239953
69	D'Agostino	2001	JAMA	Wilson women Total cholesterol	Existing cohort	1987	1988	NA	ARIC study	United States	North America	Population based	44	66	Narrower	0	0	0	0		0	0	0	NA	5	<10 year	53.9	5.5	NA	NA	53.8	11.2	216.2	37.7	0	25	6	5712	52	Fatal or nonfatal CHD	Hard CHD: coronary death or myocardial infarction				0.83	0.766351043782168	0.879046750899508	0.0286380245248272	0.815709987641321
70	D'Agostino	2001	JAMA	Wilson women Total cholesterol	Existing cohort	1987	1988	NA	ARIC study	United States	North America	Population based	44	66	Narrower	0	0	0	0		0	0	0	NA	5	<10 year	53.3	5.5	NA	NA	54.1	10.9	216.3	40.1	0	25	17	2333	38	Fatal or nonfatal CHD	Hard CHD: coronary death or myocardial infarction				0.79	0.708559996102563	0.853391201937963	0.0369487100790783	1.06863594238866
71	D'Agostino	2001	JAMA	Wilson women Total cholesterol	Existing cohort	1989	1991	NA	Strong Heart Study	United States	North America	Population based	45	75	Narrower	0	0	0	0		0	0	0	NA	5	<10 year	56.5	7.5	NA	NA	46.9	10.8	195.7	36.6	0	30	51	2255	23	Fatal or nonfatal CHD	Hard CHD: coronary death or myocardial infarction				0.75	0.637986159367322	0.836250506110228	0.0508907663482528	0.425390592606281
72	D'Agostino	2001	JAMA	Wilson women Total cholesterol	Existing cohort	1989	1990	NA	Cardiovascular Health Study	United States	North America	Population based	65	74	Narrower	0	0	0	0		0	0	0	NA	5	<10 year	69.3	2.25	NA	NA	55.7	10.1	222.5	37	0	15	10	1601	44	Fatal or nonfatal CHD	Hard CHD: coronary death or myocardial infarction				0.66	0.574984893645436	0.735822827249127	0.0413394215553817	NA
89	DeFilippis	2015	Ann Intern Med	Wilson women Total cholesterol	Existing cohort	2000	2002	NA	MESA study	United States	North America	Multicenter	50	74	Narrower	2	1	0	1	serious disease not enabling a long-term follow-up	0	0	0	NA	10	10 year	61.5	7.1	126	22	57	16	203	35	0	12.5	0	2266	99	Fatal or nonfatal CHD	Myocardial infarction, death from CHD, and angina				0.6	0.544084837627569	0.653425738343797	0.028	0.680173661360347
92	Jee	2014	BMJ Open	Wilson women Total cholesterol	Existing cohort	1996	2001	2011	Korean Heart Study	South Korea	Asia	Multicenter	30	74	Comparable - within 5 yrs	2	0	0	1	liver disease or respiratory disease	0	0	0	11.6	10	10 year	47.6	10	121	19.6	54.5	12.7	195.1	37.4	0	5.1	6	104310	510	Fatal or nonfatal CHD	Hard CHD: acute myocardial infarction, sudden death and other coronary deaths				NA	NA	NA	NA	NA
105	Ryckman	2015	Abdom Imaging	Wilson women Unclear	Existing cohort	2004	2005	NA	Series of adults undergoing colorectal cancer screening	United States	North America	NR	NA	NA	NR	1	0	0	0		0	0	0	NA	NA	NR	NA	NA	NA	NA	NA	NA	NA	NA	0	NA	NA	NA	NA	Fatal or nonfatal CHD	myocardial infarction or any coronary artery procedure leading to intervention (e.g., coronary artery bypass, stenting, or angioplasty)				NA	NA	NA	NA	NA
10	Cooper	2005	Atherosclerosis	ATP III men	Prospective cohort	1989	NA	NA	Second Northwick Park Heart Study	United Kingdom	Europe	Multicenter	50	64	Narrower	2	0	0	1		0	0	1	10.8	10	10 year	NA	3.5	NA	NA	NA	NA	NA	NA	100	NA	NA	2732	219	Fatal or nonfatal CHD	sudden coronary death, fatal acute myocardial infarction, and nonfatal acute myocardial infarction, coronary artery revascularization				0.62	0.579149914300676	0.659218103144729	0.0204663726062064	0.47
13	Koller	2012	Annals of Internal Medicine	ATP III men	Existing cohort	1990	1993	2007	Rotterdam Study	Netherlands	Europe	Population based	65	NA	NR	2	0	0	0		0	0	0	14.9	10	10 year	73.3333333333333	6.67840400960582	139.2	21.3	46.3333333333333	11.5016957943211	234.2	42.9643991284641	100	30	10	1454	283	Fatal or nonfatal CHD	Fatal and nonfatal MI, atherosclerotic CHD death. Definitions: Nonfatal MI: ECG and cardiac enzyme changes, fatal MI: MI 28 d before death and no known nonatherosclerotic cause of death. Atherosclerotic CHD death: Chest pain < 72 h before death and no kn	own nonatherosclerotic cause of death, History of ischemic heart disease in the absence of valvular heart disease or nonischemic cardiomyopathy and no known nonatherosclerotic cause of death, Mode of death consistent with CHD in the absence of significant	valvular heart disease or nonischemic cardiomyopathy and no known nonatherosclerotic cause of death. Coronary death related to CHD procedures, such as PCI or CABG		0.6	0.564620326937958	0.634366445069652	0.0178200064425401	NA
15	Koller	2012	Annals of Internal Medicine	ATP III men	Existing cohort	1989	1992	2006	Cardiovascular Health Study	United States	North America	Population based	65	NA	NR	2	0	0	0		0	0	0	16.5	10	10 year	72.6666666666667	5.93492133975823	134	21	46.3333333333333	11.4989100957816	196.9	34.4225437705977	100	12	17	1917	563	Fatal or nonfatal CHD	Fatal and nonfatal MI, atherosclerotic CHD death. Definitions: Nonfatal MI: ECG and or cardiac enzyme changes, fatal MI: MI 28 d before death and no known nonatherosclerotic cause of death. Atherosclerotic CHD death: Chest pain 72 h before death and no	known nonatherosclerotic cause of death, History of chronic ischemic heart disease in the absence of valvular heart disease or nonischemic cardiomyopathy and no known nonatherosclerotic cause of death, Death certificate consistent with atherosclerotic CHD	death and no known nonatherosclerotic cause of death. Coronary death related to CHD procedures, such as PCI or CABG		0.6	0.569614862693618	0.62963475716838	0.0153287915644067	NA
54	Koller	2007	American Heart Journal	ATP III men	Existing cohort	1990	1993	2006	Rotterdam Study	Netherlands	Europe	Population based	55	NA	NR	2	0	0	0		0	0	0	12.9	10	10 year	68.5	NA	NA	NA	NA	NA	NA	NA	100	30.1	NA	2452	351	Fatal or nonfatal CHD	nonfatal MI and fatal CHD. The latter consisted of fatal MI (I21, I24), sudden cardiac death (I46, I49, R96), death from chronic ischemic heart disease (I25), and death due to heart failure (I50) other than hypertensive (I11) or nonrheumatic valve disorde	rs (I05-I09)			0.63	0.512308766448759	0.734034340520133	0.0574391460328851	0.722222222222222
73	Simons	2003	Medical Journal of Australia	ATP III men	Existing cohort	1988	1989	NA	Dubbo Study	Australia	Australia	Population based	60	79	Narrower	2	1	0	0		0	0	0	NA	10	10 year	NA	4.75	NA	NA	NA	NA	NA	NA	100	NA	0	755	105	Fatal or nonfatal CHD	myocardial infarction or coronary death.				NA	NA	NA	NA	0.953731
85	DeFilippis	2015	Ann Intern Med	ATP III men	Existing cohort	2000	2002	NA	MESA study	United States	North America	Multicenter	50	74	Narrower	2	1	0	1	serious disease not enabling a long-term follow-up	0	0	0	NA	10	10 year	61.5	7.1	126	21	52	15	197	35	100	14	0	1961	86	Fatal or nonfatal CHD	Myocardial infarction and death from CHD				0.71	0.654384016783571	0.759949381625968	0.027	0.385512073272273
99	Kavousi	2014	JAMA	ATP III men	Existing cohort	1997	2001	2012	Rotterdam Study	Netherlands	Europe	Population based	55	75	Narrower	2	1	0	0		0	1	1	NA	10	10 year	64.9	5.2	142	21	49	12.4	222.4	35.9	100	20.1	0	1431	98	Fatal or nonfatal CHD	hard CHD: fatal and nonfatal MI and CHD mortality				0.67	0.61791886628135	0.718219316998676	0.0256589789123982	0.422360248447205
14	Koller	2012	Annals of Internal Medicine	ATP III women	Existing cohort	1990	1993	2007	Rotterdam Study	Netherlands	Europe	Population based	65	NA	NR	2	0	0	0		0	0	0	14.9	10	10 year	76.3333333333333	9.64184765707762	144.3	21.9	54.0666666666667	11.4960491295925	258.7	45.835860400569	0	13	12	2849	415	Fatal or nonfatal CHD	Fatal and nonfatal MI, atherosclerotic CHD death. Definitions: Nonfatal MI: ECG and cardiac enzyme changes, fatal MI: MI 28 d before death and no known nonatherosclerotic cause of death. Atherosclerotic CHD death: Chest pain < 72 h before death and no kn	own nonatherosclerotic cause of death, History of ischemic heart disease in the absence of valvular heart disease or nonischemic cardiomyopathy and no known nonatherosclerotic cause of death, Mode of death consistent with CHD in the absence of significant	valvular heart disease or nonischemic cardiomyopathy and no known nonatherosclerotic cause of death. Coronary death related to CHD procedures, such as PCI or CABG		0.65	0.613903596255649	0.684456296001068	0.0180245453673683	NA
16	Koller	2012	Annals of Internal Medicine	ATP III women	Existing cohort	1989	1992	2006	Cardiovascular Health Study	United States	North America	Population based	65	NA	NR	2	0	0	0		0	0	0	16.5	10	10 year	71.6666666666667	5.9332642534767	134.5	21.6	57.9	17.2064663350824	217.5	37.1570673873978	0	12	13	3029	603	Fatal or nonfatal CHD	Fatal and nonfatal MI, atherosclerotic CHD death. Definitions: Nonfatal MI: ECG and or cardiac enzyme changes, fatal MI: MI 28 d before death and no known nonatherosclerotic cause of death. Atherosclerotic CHD death: Chest pain 72 h before death and no	known nonatherosclerotic cause of death, History of chronic ischemic heart disease in the absence of valvular heart disease or nonischemic cardiomyopathy and no known nonatherosclerotic cause of death, Death certificate consistent with atherosclerotic CHD	death and no known nonatherosclerotic cause of death. Coronary death related to CHD procedures, such as PCI or CABG		0.66	0.634347753313326	0.684746983615782	0.0128663223474064	NA
55	Koller	2007	American Heart Journal	ATP III women	Existing cohort	1990	1993	2006	Rotterdam Study	Netherlands	Europe	Population based	55	NA	NR	2	0	0	0		0	0	0	12.9	10	10 year	71.1	NA	NA	NA	NA	NA	NA	NA	0	16.7	NA	4343	448	Fatal or nonfatal CHD	nonfatal MI and fatal CHD. The latter consisted of fatal MI (I21, I24), sudden cardiac death (I46, I49, R96), death from chronic ischemic heart disease (I25), and death due to heart failure (I50) other than hypertensive (I11) or nonrheumatic valve disorde	rs (I05-I09)			0.73	0.625115784153595	0.814259032759944	0.0486015322753675	0.98019801980198
74	Simons	2003	Medical Journal of Australia	ATP III women	Existing cohort	1988	1989	NA	Dubbo Study	Australia	Australia	Population based	60	79	Narrower	2	1	0	0		0	0	0	NA	10	10 year	NA	4.75	NA	NA	NA	NA	NA	NA	0	NA	0	1045	80	Fatal or nonfatal CHD	myocardial infarction or coronary death.				NA	NA	NA	NA	0.898824
86	DeFilippis	2015	Ann Intern Med	ATP III women	Existing cohort	2000	2002	NA	MESA study	United States	North America	Multicenter	50	74	Narrower	2	1	0	1	serious disease not enabling a long-term follow-up	0	0	0	NA	10	10 year	61.5	7.1	126	22	57	16	203	35	0	12.5	0	2266	48	Fatal or nonfatal CHD	Myocardial infarction and death from CHD				0.67	0.589635592386084	0.741525206006259	0.039	0.692537313432836
100	Kavousi	2014	JAMA	ATP III women	Existing cohort	1997	2001	2012	Rotterdam Study	Netherlands	Europe	Population based	55	75	Narrower	2	1	0	0		0	1	1	NA	10	10 year	65.1	5.2	139	20	59.8	15.1	236.7	35.9	0	19.3	0	1976	62	Fatal or nonfatal CHD	hard CHD: fatal and nonfatal MI and CHD mortality				0.69	0.626426425600258	0.74712217168801	0.0309066883476408	0.574074074074074
76	Andersson	2015	Journal of the American Heart Association	PCE men white	Existing cohort	1971	1998	NA	Framingham Heart Study Offspring Cohort	Framingham	North America	Single center	40	75	Comparable - within 5 yrs	2	0	0	0		0	1	1	10	10	10 year	53.3	8.53	129	18.2	45.2	12.47	210.1	37.21	100	26.6	6.35	3396	284	Fatal or nonfatal CVD	Incident myocardial infarction, nonfatal or fatal ischemic stroke (excluding transient ischemic attack), or death due to coronary artery disease				0.72	0.691757894026369	0.746602349970242	0.014	0.84
78	Chia	2014	BMC Cardiovasc Disord	PCE men white	Existing cohort	1998	1998	2007	Patients registered with an outpatient primary care clinic of University Malaya Medical Centre	Malaysia	Asia	Single center	40	79	Comparable - within 5 yrs	2	0	0	0		0	0	0	NA	10	10 year	58.7	8.4	143	17.5	42.54	15.47	224.28	42.54	100	15.6	43	307	22	Fatal or nonfatal CVD	ASCVD event is defined as nonfatal myocardial infarction (MI), CHD death, nonfatal and fatal stroke.				0.55	0.451332349559558	0.644884992162179	0.05	0.341232227488152
82	DeFilippis	2015	Ann Intern Med	PCE men	Existing cohort	2000	2002	NA	MESA study	United States	North America	Multicenter	50	74	Narrower	2	1	0	1	serious disease not enabling a long-term follow-up	0	0	0	NA	10	10 year	61.5	7.1	126	21	52	15	197	35	100	14	0	1961	125	Fatal or nonfatal CVD	Myocardial infarction, death from CHD, and stroke				0.71	0.667185131643054	0.749375973767448	0.021	0.531298904538341
93	Khalili	2015	Int J Cardiol	PCE men white	Existing cohort	1999	2001	2019	Tehran Lipid and Glucose Study (TLGS)	Iran	Asia	Population based	40	75	Comparable - within 5 yrs	0	0	0	0		0	1	1	10.1	10	10 year	54.6	9.9	125.4	20.8	38	9.9	209.7	42.1	100	29.5	17.1	2353	200	Fatal or nonfatal CVD	In the current study, first occurrence of CVD during the follow-up period was the targeted event. Cardiovascular diseases are defined as any coronary heart disease (CHD) (myocardial infarction, unstable angina, angiographic proven CHD and CHD death) and c	erebrovascular events (ischemic or hemorrhagic stroke, and cerebrovascular death). Hard CVD event considered as first nonfatal MI, CHD death and fatal or nonfatal stroke			0.74	0.702832780711086	0.774013336990365	0.0181743950749954	0.758064516129032
95	Lee	2015	Journal of Clinical Lipidology	PCE men white	Existing cohort	1995	2004	2012	Hong Kong Cardiovascular Risk Factor Prevalence Study (CRISPS) cohort	China	Asia	Population based	40	74	Comparable - within 5 yrs	2	0	0	0		0	0	0	10	10	10 year	55.8072164948454	10.5975364922136	126.819587628866	17.4971295363723	NA	NA	203.434756995582	30.097737538206	100	27.2	16.3531664212077	679	80	Fatal or nonfatal CVD	Hard ASCVD was defined as all-fatal or nonfatal myocardial infarction, stroke, and CHD or strokerelated mortality.				0.714	0.60957776268996	0.799671835112787	0.0488999233550189	1.05384615384615
101	Kavousi	2014	JAMA	PCE men	Existing cohort	1997	2001	2012	Rotterdam Study	Netherlands	Europe	Population based	55	75	Narrower	2	0	0	0		0	1	1	NA	10	10 year	65.1	5.2	143	21	48.3	12.4	215.4	31.3	100	20.1	NA	1513	192	Fatal or nonfatal CVD	hard ASCVD: fatal and nonfatal myocardial infarction (MI), other CHD mortality, and stroke				0.67	0.62868932497919	0.70884312145732	0.0204841200954871	0.590697674418605
106	Jung	2015	Atherosclerosis	PCE men white	Existing cohort	1996	2001	2012	Korean Heart Study	South Korea	Asia	Multicenter	40	79	Comparable - within 5 yrs	2	0	0	0		0	1	1	NA	10	10 year	50.13	7.94	124.79	17.16	47.98	10.88	196.84	34.79	100	49.4	10.49	114622	7669	Fatal or nonfatal CVD	death from CHD or fatal stroke or the first occurrence of nonfatal myocardial infarction or stroke				0.727	0.72044326271244	0.733459849513405	0.00332067143947565	0.634307257
108	Jung	2015	Atherosclerosis	PCE men African American	Existing cohort	1996	2001	2012	Korean Heart Study	South Korea	Asia	Multicenter	40	79	Comparable - within 5 yrs	2	0	0	0		0	1	1	NA	10	10 year	50.13	7.94	124.79	17.16	47.98	10.88	196.84	34.79	100	49.4	10.49	114622	7669	Fatal or nonfatal CVD	death from CHD or fatal stroke or the first occurrence of nonfatal myocardial infarction or stroke				0.725	0.718458921598507	0.73144591375073	0.00331312316737286	1.345971564
111	Muntner	2014	JAMA	PCE men	Existing cohort	2003	2007	2010	REGARDS study	United States	North America	Population based	45	79	Comparable - within 5 yrs	2	0	0	0		0	0	0	NA	5	<10 year	NA	8.5	NA	NA	NA	NA	NA	NA	100	NA	NA	NA	376	Fatal or nonfatal CVD	Consistent with the definition used to derive the Pooled Cohort risk equations, the outcome for our primary analyses was defined as the first atherosclerotic cardiovascular disease event, which included a nonfatal or fatal stroke, a nonfatal MI, or CHD de	ath.			0.65	0.619381772032256	0.679429972655417	0.0153346858041188	0.721295
115	Goff	2014	Circulation	PCE men white	Combination of existing cohorts	NA	NA	NA	ARIC study, Framingham Heart Study	Framingham	North America	Population based	40	79	Comparable - within 5 yrs	2	0	0	0		0	0	0	NA	10	10 year	NA	9.75	NA	NA	NA	NA	NA	NA	100	NA	NA	5041	539	Fatal or nonfatal CVD	first ASCVD event, defined as nonfatal myocardial infarction or coronary heart disease death, or fatal or nonfatal stroke.				0.6843	0.660234339902709	0.707416469360398	0.012043353990234	0.727124796595319
116	Goff	2014	Circulation	PCE men white	Existing cohort	2000	2002	NA	MESA study	United States	North America	Population based	40	79	Comparable - within 5 yrs	2	0	0	0		0	0	0	NA	6	<10 year	NA	9.75	NA	NA	NA	NA	NA	NA	100	NA	NA	1184	57	Fatal or nonfatal CVD	NR				0.7044	0.631333136293633	0.768300227781567	0.0350999383940963	0.635586318340425
117	Goff	2014	Circulation	PCE men white	Existing cohort	2003	2007	NA	REGARDS study	United States	North America	Population based	40	79	Comparable - within 5 yrs	2	0	0	0		0	0	0	NA	4	<10 year	NA	9.75	NA	NA	NA	NA	NA	NA	100	NA	NA	5296	218	Fatal or nonfatal CVD	NR				0.595	0.556225728066164	0.632624026454961	0.0195258818177505	0.823250298049209
121	Goff	2014	Circulation	PCE men African American	Combination of existing cohorts	NA	NA	NA	ARIC study, Framingham Heart Study	Framingham	North America	Population based	40	79	Comparable - within 5 yrs	2	0	0	0		0	0	0	NA	10	10 year	NA	9.75	NA	NA	NA	NA	NA	NA	100	NA	NA	735	107	Fatal or nonfatal CVD	first ASCVD event, defined as nonfatal myocardial infarction or coronary heart disease death, or fatal or nonfatal stroke.				0.7109	0.655617144608334	0.760549637872499	0.0268368853291244	0.943708609271523
122	Goff	2014	Circulation	PCE men African American	Existing cohort	2000	2002	NA	MESA study	United States	North America	Population based	40	79	Comparable - within 5 yrs	2	0	0	0		0	0	0	NA	6	<10 year	NA	9.75	NA	NA	NA	NA	NA	NA	100	NA	NA	799	36	Fatal or nonfatal CVD	NR				0.6689	0.573986895945641	0.751810512073061	0.045772286304822	0.537611065661087
123	Goff	2014	Circulation	PCE men African American	Existing cohort	2003	2007	NA	REGARDS study	United States	North America	Population based	40	79	Comparable - within 5 yrs	2	0	0	0		0	0	0	NA	4	<10 year	NA	9.75	NA	NA	NA	NA	NA	NA	100	NA	NA	2969	136	Fatal or nonfatal CVD	NR				0.5564	0.506715828151049	0.604981070100551	0.0251477467715863	0.903526310798432
127	De Filippis	2017	European Heart Journal	PCE men	Existing cohort	2000	2002	NA	MESA study	United States	North America	Multicenter	45	79	Comparable - within 5 yrs	1	0	1	1	Any serious medical condition which would prevent long-term participation	0	0	0	NA	10	10 year	NA	8.5	NA	NA	NA	NA	NA	NA	100	NA	NA	3053	220	Fatal or nonfatal CVD	myocardial infarction (MI), definite or probable angina, resuscitated cardiac arrest, coronary heart disease (CHD) death, stroke (not transient ischaemic attack), stroke death, other atherosclerotic death, or other CVD death.	NA	NA	NA	0.71	0.67356135803483	0.743917599104389	0.0179686573250071	0.52
129	De Las Heras Gala	2016	PLoS ONE	PCE men white	Existing cohort	1994	2001	2009	Kora study	Germany	Europe	Multicenter	40	79	Comparable - within 5 yrs	2	0	0	0		0	0	0	NA	10	10 year	56.4	9.6	136.666666666667	17.8012684666994	48.6666666666667	13.3509513500245	235.333333333333	40.7945735695194	100	25	5	2584	257	Fatal or nonfatal CVD	Fatal/non-fatal stroke, fatal/non-fatal MI	NA	NA	NA	0.736	0.70557145919129	0.764334177620303	0.015	0.7
131	De Las Heras Gala	2016	PLoS ONE	PCE men white	Existing cohort	2000	2003	NA	HNR study	Germany	Europe	Multicenter	40	79	Comparable - within 5 yrs	2	0	0	0		0	0	0	NA	10	10 year	58.8	7.6	137	17.8041695993308	50	12.611286799526	225.666666666667	34.8664987986894	100	26	8	2005	186	Fatal or nonfatal CVD	myocardial infarction, sudden cardiac death and fatal coronary heart disease, fatal/non-fatal stroke	NA	NA	NA	0.67	0.629690600286958	0.707956605867686	0.02	0.62
133	Emdin	2017	American Journal of Cardiology	PCE men	Existing cohort	2008	2009	NA	BioImage study	United States	North America	Multicenter	55	80	Narrower	2	0	0	0	Excluded any serious medical condition precluding long-term participation or inability to complete 3-y follow-up (eg, dementia, cognitive impairment or Alzheimer Disease, advanced COPD)	0	1	1	2.7	10	10 year	NA	6.25	NA	NA	NA	NA	NA	NA	100	NA	NA	1635	43	Fatal or nonfatal CVD	cardiovascular death, myocardial infarction, and stroke	NA	NA	NA	0.63	0.539993013292764	0.711795243730242	0.044229808117944	0.41
135	Mortensen	2015	Journal of the American College of Cardiology	PCE men	Existing registry	2003	2008	2010	Copenhagen General Population Study	Denmark	Europe	Population based	40	75	Comparable - within 5 yrs	2	1	0	0		0	1	1	NA	5	<10 year	56	11.8618723771475	141.666666666667	18.5341755892929	54.138	17.201197680911	221.708	37.2692616419738	100	24	0	16398	467	Fatal or nonfatal CVD	first, hard ASCVD event, including non-fatal yocardial infarction (MI), fatal coronary heart disease (CHD), and stroke (fatal and non-fatal) . Stroke: used WHO definition: an acute disturbance of focal or global cerebral function with symptoms lasting lo	NA	NA	NA	0.647	0.621469948276511	0.67171772899399	0.0128279007215924	0.597309653957155
137	Mortensen	2017	European Heart Journal	PCE men	Existing registry	2003	2009	NA	Copenhagen General Population Study	Denmark	Europe	Population based	40	75	Comparable - within 5 yrs	2	1	0	0		0	1	1	NA	5	<10 year	56	11.8617099559428	141.666666666667	18.5339218061606	54.138	17.2009621498615	221.708	37.2687513246999	100	23	0	19383	1205	Fatal or nonfatal CVD	first hard ASCVD event, including nonfatal myocardial infarction, coronary death, and stroke	NA	NA	NA	0.71	0.6948083224677	0.72473506203658	0.00763595536606473	0.661360415630718
139	Pike	2016	Journal of Cardiovascular Translational Research	PCE men	Existing registry	2005	2012	2015	Mayo Clinic Biobank	United States	North America	Single center	30	75	Younger	2	0	0	0		0	0	0	NA	10	10 year	59	10	122	14	51	15	181	32	100	4	14	3093	246	Fatal or nonfatal CVD	Angina pectoris, acute MI, CHD, chronic ischemic cerebral infarction, stroke, and transient ischemic attack	NA	NA	NA	0.63	0.594487898457659	0.664159053321668	0.01779970275042	0.61015688
141	Rana	2016	Journal of the American College of Cardiology	PCE men	Existing registry	2008	2008	2013	Kaiser Permanente Northern California	United States	North America	Multicenter	40	75	Comparable - within 5 yrs	2	1	0	0		0	1	1	NA	5	<10 year	NA	8.75	NA	NA	NA	NA	NA	NA	100	NA	NA	118080	NA	Fatal or nonfatal CVD	acute myocardial infarction, coronary heart disease (CHD) death, or fatal or nonfatal ischemic stroke	NA	NA	NA	0.68	2.12452659879803e-05	0.999995295088188	1.27819206114394	NA
143	Sussman	2017	Medical Care	PCE men	Existing registry	2006	2007	2011	US Department of Veterans Affairs	United States	North America	Multicenter	45	80	Comparable - within 5 yrs	2	0	0	0		0	0	1	NA	5	<10 year	62	8.6	135.6	15.1	44.6	12.95	183.8	34.8	100	26.3	24.8	1435937	80412	Fatal or nonfatal CVD	Hard CVD events included the first occurrence of nonfatal myocardial infarction, Coronary Heart Disease death, fatal or nonfatal stroke	NA	NA	NA	0.657	0.65306936443574	0.660909225221016	0.002	0.626667203932789
145	Yang	2016	Circulation	PCE men white	Existing cohort	1998	2001	2015	InterASIA and China MUCA (1998)	China	Asia	Population based	35	74	Comparable - within 5 yrs	2	0	0	0		0	0	0	NA	10	10 year	48.8	9.4	124.8	19	50.4	13.9	186.6	37.6	100	60.7	5.1	10334	451	Fatal or nonfatal CVD	nonfatal acute MI or CHD death or fatal or nonfatal stroke. Acute MI was identified as a change in biochemical markers of myocardial necrosis accompanied by ischemic symptoms, pathological Q waves, ST-segment elevation or depression, or coronary intervent	NA	NA	NA	0.762	0.739821365540571	0.782842980419139	0.0109771801449226	0.657258064516129
146	Yang	2016	Circulation	PCE men white	Existing cohort	1992	1994	2015	China MUCA (1992)	China	Asia	Population based	35	59	Narrower	2	0	0	0		0	0	0	NA	10	10 year	46.5	7.4	123.2	18	50	13.7	176.7	37.4	100	70.1	2.9	6565	216	Fatal or nonfatal CVD	nonfatal acute MI or CHD death or fatal or nonfatal stroke. Acute MI was identified as a change in biochemical markers of myocardial necrosis accompanied by ischemic symptoms, pathological Q waves, ST-segment elevation or depression, or coronary intervent	NA	NA	NA	0.768	0.73094487438246	0.801338799389369	0.017965831738702	0.649154051647373
147	Yang	2016	Circulation	PCE men white	Existing cohort	2007	2008	2015	CIMIC	China	Asia	Population based	16	99	Broader	2	0	0	0		0	0	0	NA	5	<10 year	55.3	10.2	131.6	20.5	50.2	13	168.9	31.8	100	50.2	6.2	26872	755	Fatal or nonfatal CVD	nonfatal acute MI or CHD death or fatal or nonfatal stroke. Acute MI was identified as a change in biochemical markers of myocardial necrosis accompanied by ischemic symptoms, pathological Q waves, ST-segment elevation or depression, or coronary intervent	NA	NA	NA	0.761	0.743563921706255	0.777605120824779	0.00868513943932834	0.635841913330563
151	Yang	2016	Circulation	PCE men African American	Existing cohort	1998	2001	2015	InterASIA and China MUCA (1998)	China	Asia	Population based	35	74	Comparable - within 5 yrs	2	0	0	0		0	0	0	NA	10	10 year	48.8	9.4	124.8	19	50.4	13.9	186.6	37.6	100	60.7	5.1	10334	451	Fatal or nonfatal CVD	nonfatal acute MI or CHD death or fatal or nonfatal stroke. Acute MI was identified as a change in biochemical markers of myocardial necrosis accompanied by ischemic symptoms, pathological Q waves, ST-segment elevation or depression, or coronary intervent	NA	NA	NA	0.769	0.74728708732929	0.789373172139467	0.0107379095110131	0.562269537290353
152	Yang	2016	Circulation	PCE men African American	Existing cohort	1992	1994	2015	China MUCA (1992)	China	Asia	Population based	35	59	Narrower	2	0	0	0		0	0	0	NA	10	10 year	46.5	7.4	123.2	18	50	13.7	176.7	37.4	100	70.1	2.9	6565	216	Fatal or nonfatal CVD	nonfatal acute MI or CHD death or fatal or nonfatal stroke. Acute MI was identified as a change in biochemical markers of myocardial necrosis accompanied by ischemic symptoms, pathological Q waves, ST-segment elevation or depression, or coronary intervent	NA	NA	NA	0.79	0.75535716641497	0.820900361456088	0.0167198450243546	0.482355535950595
153	Yang	2016	Circulation	PCE men African American	Existing cohort	2007	2008	2015	CIMIC	China	Asia	Population based	16	99	Broader	2	0	0	0		0	0	0	NA	5	<10 year	55.3	10.2	131.6	20.5	50.2	13	168.9	31.8	100	50.2	6.2	26872	755	Fatal or nonfatal CVD	nonfatal acute MI or CHD death or fatal or nonfatal stroke. Acute MI was identified as a change in biochemical markers of myocardial necrosis accompanied by ischemic symptoms, pathological Q waves, ST-segment elevation or depression, or coronary intervent	NA	NA	NA	0.75	0.733143162260653	0.766131692861922	0.00841680059004607	0.600298649402689
77	Andersson	2015	Journal of the American Heart Association	PCE women white	Existing cohort	1971	1998	NA	Framingham Heart Study Offspring Cohort	Framingham	North America	Single center	40	75	Comparable - within 5 yrs	2	0	0	0		0	1	1	10	10	10 year	53.1	8.59	128.2	19.35	58.9	16.11	214.1	39.99	0	26.7	3.58	3838	112	Fatal or nonfatal CVD	Incident myocardial infarction, nonfatal or fatal ischemic stroke (excluding transient ischemic attack), or death due to coronary artery disease				0.773	0.724804554448903	0.814910316093306	0.023	0.674418604651163
79	Chia	2014	BMC Cardiovasc Disord	PCE women white	Existing cohort	1998	1998	2007	Patients registered with an outpatient primary care clinic of University Malaya Medical Centre	Malaysia	Asia	Single center	40	79	Comparable - within 5 yrs	2	0	0	0		0	0	0	NA	10	10 year	56.9	8.9	139.9	19.1	50.27	15.47	239.75	42.54	0	1.3	43.6	615	23	Fatal or nonfatal CVD	ASCVD event is defined as nonfatal myocardial infarction (MI), CHD death, nonfatal and fatal stroke.				0.61	0.488248882128722	0.719430319168803	0.06	0.552238805970149
81	Cook	2014	JAMA Internal Medicine	PCE women	Existing RCT	1992	1995	2004	Womens Health Study	United States	North America	Population based	45	79	Comparable - within 5 yrs	2	0	0	1	other major illness	0	0	0	10.2	10	10 year	54.2	7	123.7	13.7	53.8	15.1	211.8	41.8	0	NA	2.5	27542	632	Fatal or nonfatal CVD	Incident MI, stroke, and cardiovascular deaths. Reported eventswere adjudicated by an end-points committee of physicians after medical record review.Myocardial infarction was confirmed if symptoms metWorld Health Organization criteria and if the event was	associatedwith abnormal levels of cardiac enzymes or diagnostic electrocardiograms. A confirmed stroke was defined as a new neurologic deficit of sudden onset that persisted for at least 24 hours. Deathwas confirmed to be fromcardiovascular causes on the	basis of an examination of autopsy reports, death certificates, medical records,andinformation obtained fromthenext of kin or other family members. Owing to the difficulty in distinguishing type of cardiovascular death,11 all such deathswere included rat	her than fatal MI and fatal stroke as used in the derivation cohorts for the pooled risk equations.	NA	NA	NA	NA	0.611111111111111
83	DeFilippis	2015	Ann Intern Med	PCE women	Existing cohort	2000	2002	NA	MESA study	United States	North America	Multicenter	50	74	Narrower	2	1	0	1	serious disease not enabling a long-term follow-up	0	0	0	NA	10	10 year	61.5	7.1	126	22	57	16	203	35	0	12.5	0	2266	93	Fatal or nonfatal CVD	Myocardial infarction, death from CHD, and stroke				0.7	0.644579795471222	0.75012852266442	0.027	0.599458728010825
94	Khalili	2015	Int J Cardiol	PCE women white	Existing cohort	1999	2001	2019	Tehran Lipid and Glucose Study (TLGS)	Iran	Asia	Population based	40	75	Comparable - within 5 yrs	0	0	0	0		0	1	1	10.1	10	10 year	52.5	9	127	21.5	44.7	11.2	228.4	47.4	0	4.6	19	2749	98	Fatal or nonfatal CVD	In the current study, first occurrence of CVD during the follow-up period was the targeted event. Cardiovascular diseases are defined as any coronary heart disease (CHD) (myocardial infarction, unstable angina, angiographic proven CHD and CHD death) and c	erebrovascular events (ischemic or hemorrhagic stroke, and cerebrovascular death). Hard CVD event considered as first nonfatal MI, CHD death and fatal or nonfatal stroke			0.82	0.775830332436399	0.857069968177231	0.0206953910918794	0.838775510204082
96	Lee	2015	Journal of Clinical Lipidology	PCE women white	Existing cohort	1995	2004	2012	Hong Kong Cardiovascular Risk Factor Prevalence Study (CRISPS) cohort	China	Asia	Population based	40	74	Comparable - within 5 yrs	2	0	0	0		0	0	0	10	10	10 year	53.4111668757842	10.0236392712281	121.921957340025	20.3218937728689	NA	NA	204.379171894605	23.7171813517791	0	3	12.4011292346299	797	42	Fatal or nonfatal CVD	Hard ASCVD was defined as all-fatal or nonfatal myocardial infarction, stroke, and CHD or strokerelated mortality.				0.765	0.679446225637687	0.833321482942693	0.0393544234768035	1.4375
102	Kavousi	2014	JAMA	PCE women	Existing cohort	1997	2001	2012	Rotterdam Study	Netherlands	Europe	Population based	55	75	Narrower	2	0	0	0		0	1	1	NA	10	10 year	65.2	5.3	140	21	59.5	15.4	228.2	29.3	0	18.8	NA	1920	151	Fatal or nonfatal CVD	hard ASCVD: fatal and nonfatal myocardial infarction (MI), other CHD mortality, and stroke				0.68	0.632774666709803	0.723802998573183	0.0232735486825137	0.681034482758621
107	Jung	2015	Atherosclerosis	PCE women white	Existing cohort	1996	2001	2012	Korean Heart Study	South Korea	Asia	Multicenter	40	79	Comparable - within 5 yrs	2	0	0	0		0	1	1	NA	10	10 year	51.81	8.12	124.49	20.3	54.23	12.83	201.22	37.44	0	4.49	7.43	77983	4658	Fatal or nonfatal CVD	death from CHD or fatal stroke or the first occurrence of nonfatal myocardial infarction or stroke				0.738	0.729419685825719	0.746402822622771	0.00433265594599616	0.570338983
109	Jung	2015	Atherosclerosis	PCE women African American	Existing cohort	1996	2001	2012	Korean Heart Study	South Korea	Asia	Multicenter	40	79	Comparable - within 5 yrs	2	0	0	0		0	1	1	NA	10	10 year	51.81	8.12	124.49	20.3	54.23	12.83	201.22	37.44	0	4.49	7.43	77983	4658	Fatal or nonfatal CVD	death from CHD or fatal stroke or the first occurrence of nonfatal myocardial infarction or stroke				0.739	0.730918950078349	0.746922390099235	0.00408269444141305	0.754316069
112	Muntner	2014	JAMA	PCE women	Existing cohort	2003	2007	2010	REGARDS study	United States	North America	Population based	45	79	Comparable - within 5 yrs	2	0	0	0		0	0	0	NA	5	<10 year	NA	8.5	NA	NA	NA	NA	NA	NA	0	NA	NA	NA	298	Fatal or nonfatal CVD	Consistent with the definition used to derive the Pooled Cohort risk equations, the outcome for our primary analyses was defined as the first atherosclerotic cardiovascular disease event, which included a nonfatal or fatal stroke, a nonfatal MI, or CHD de	ath.			0.74	0.714495408472783	0.763978843637951	0.0126287134481226	0.812852
118	Goff	2014	Circulation	PCE women white	Combination of existing cohorts	NA	NA	NA	ARIC study, Framingham Heart Study	Framingham	North America	Population based	40	79	Comparable - within 5 yrs	2	0	0	0		0	0	0	NA	10	10 year	NA	9.75	NA	NA	NA	NA	NA	NA	0	NA	NA	6509	400	Fatal or nonfatal CVD	first ASCVD event, defined as nonfatal myocardial infarction or coronary heart disease death, or fatal or nonfatal stroke.				0.7377	0.711921043966514	0.761943485495347	0.0127665645466742	0.776665453221696
119	Goff	2014	Circulation	PCE women white	Existing cohort	2000	2002	NA	MESA study	United States	North America	Population based	40	79	Comparable - within 5 yrs	2	0	0	0		0	0	0	NA	6	<10 year	NA	9.75	NA	NA	NA	NA	NA	NA	0	NA	NA	1273	37	Fatal or nonfatal CVD	NR				0.7109	0.62048465559285	0.787163615491606	0.042798034377178	0.77190560718821
120	Goff	2014	Circulation	PCE women white	Existing cohort	2003	2007	NA	REGARDS study	United States	North America	Population based	40	79	Comparable - within 5 yrs	2	0	0	0		0	0	0	NA	4	<10 year	NA	9.75	NA	NA	NA	NA	NA	NA	0	NA	NA	6333	101	Fatal or nonfatal CVD	NR				0.6599	0.604918216224247	0.710887181627685	0.0271205607153991	0.78739333237687
124	Goff	2014	Circulation	PCE women African American	Combination of existing cohorts	NA	NA	NA	ARIC study, Framingham Heart Study	Framingham	North America	Population based	40	79	Comparable - within 5 yrs	2	0	0	0		0	0	0	NA	10	10 year	NA	9.75	NA	NA	NA	NA	NA	NA	0	NA	NA	1367	127	Fatal or nonfatal CVD	first ASCVD event, defined as nonfatal myocardial infarction or coronary heart disease death, or fatal or nonfatal stroke.				0.7068	0.657625924391559	0.751579329277902	0.0240180155733393	0.943708609271523
125	Goff	2014	Circulation	PCE women African American	Existing cohort	2000	2002	NA	MESA study	United States	North America	Population based	40	79	Comparable - within 5 yrs	2	0	0	0		0	0	0	NA	6	<10 year	NA	9.75	NA	NA	NA	NA	NA	NA	0	NA	NA	978	28	Fatal or nonfatal CVD	NR				0.7684	0.668618142326096	0.845097434859488	0.0451583451453415	0.511953551763519
126	Goff	2014	Circulation	PCE women African American	Existing cohort	2003	2007	NA	REGARDS study	United States	North America	Population based	40	79	Comparable - within 5 yrs	2	0	0	0		0	0	0	NA	4	<10 year	NA	9.75	NA	NA	NA	NA	NA	NA	0	NA	NA	5275	126	Fatal or nonfatal CVD	NR				0.6625	0.613304018241169	0.708412855130154	0.0243252991534982	0.683224973092385
128	De Filippis	2017	European Heart Journal	PCE women	Existing cohort	2000	2002	NA	MESA study	United States	North America	Multicenter	45	79	Comparable - within 5 yrs	1	0	1	1	Any serious medical condition which would prevent long-term participation	0	0	0	NA	10	10 year	NA	8.5	NA	NA	NA	NA	NA	NA	0	NA	NA	3388	149	Fatal or nonfatal CVD	myocardial infarction (MI), definite or probable angina, resuscitated cardiac arrest, coronary heart disease (CHD) death, stroke (not transient ischaemic attack), stroke death, other atherosclerotic death, or other CVD death.	NA	NA	NA	0.74	0.697523490277587	0.7784065484832	0.0206570834139662	0.5
130	De Las Heras Gala	2016	PLoS ONE	PCE women white	Existing cohort	1994	2001	2009	Kora study	Germany	Europe	Multicenter	40	79	Comparable - within 5 yrs	2	0	0	0		0	0	0	NA	10	10 year	55.5	9.7	129.333333333333	20.7678374431629	60.3333333333333	17.0592950425981	235.333333333333	40.7939664062128	0	17	4	2654	126	Fatal or nonfatal CVD	Fatal/non-fatal stroke, Data/non-fatal MI	NA	NA	NA	0.809	0.768972690355462	0.843503637760964	0.019	0.8
132	De Las Heras Gala	2016	PLoS ONE	PCE women white	Existing cohort	2000	2003	NA	HNR study	Germany	Europe	Multicenter	40	79	Comparable - within 5 yrs	2	0	0	0		0	0	0	NA	10	10 year	59.1	7.7	126.333333333333	20.7701734970808	64	16.3194220334206	233.333333333333	38.5731793517214	0	22	6	2203	84	Fatal or nonfatal CVD	myocardial infarction, sudden cardiac death and fatal coronary heart disease, fatal/non-fatal stroke	NA	NA	NA	0.756	0.701533987860478	0.803313351352615	0.026	0.59
134	Emdin	2017	American Journal of Cardiology	PCE women	Existing cohort	2008	2009	NA	BioImage study	United States	North America	Multicenter	60	80	Narrower	2	0	0	0	Excluded any serious medical condition precluding long-term participation or inability to complete 3-y follow-up (eg, dementia, cognitive impairment or Alzheimer Disease, advanced COPD)	0	1	1	2.7	10	10 year	NA	5	NA	NA	NA	NA	NA	NA	0	NA	NA	2000	31	Fatal or nonfatal CVD	cardiovascular death, myocardial infarction, and stroke	NA	NA	NA	0.63	0.568402467919603	0.687637493021574	0.0305504417104608	0.33
136	Mortensen	2015	Journal of the American College of Cardiology	PCE women	Existing registry	2003	2008	2010	Copenhagen General Population Study	Denmark	Europe	Population based	40	75	Comparable - within 5 yrs	2	1	0	0		0	1	1	NA	5	<10 year	55.6666666666667	11.8616223255497	135.666666666667	20.757839069712	69.606	17.2008350748378	224.286	40.1352818412881	0	22	0	21494	367	Fatal or nonfatal CVD	first, hard ASCVD event, including non-fatal yocardial infarction (MI), fatal coronary heart disease (CHD), and stroke (fatal and non-fatal) . Stroke: used WHO definition: an acute disturbance of focal or global cerebral function with symptoms lasting lo	NA	NA	NA	0.669	0.640765675994104	0.696067801902316	0.0141197576956234	1.05804766242767
138	Mortensen	2017	European Heart Journal	PCE women	Existing registry	2003	2009	NA	Copenhagen General Population Study	Denmark	Europe	Population based	40	75	Comparable - within 5 yrs	2	1	0	0		0	1	1	NA	5	<10 year	56	11.8614957641186	135.666666666667	20.7576175872075	68.317	20.0674268024328	224.29	40.1363362918362	0	21	0	25506	1012	Fatal or nonfatal CVD	first hard ASCVD event, including nonfatal myocardial infarction, coronary death, and stroke	NA	NA	NA	0.71	0.693599553857061	0.725869545684884	0.00823412575976161	1.2799012503067
140	Pike	2016	Journal of Cardiovascular Translational Research	PCE women	Existing registry	2005	2012	2015	Mayo Clinic Biobank	United States	North America	Single center	30	75	Younger	2	0	0	0		0	0	0	NA	10	10 year	56	11	120	16	65	18	196	34	0	5	9	5690	247	Fatal or nonfatal CVD	Angina pectoris, acute MI, CHD, chronic ischemic cerebral infarction, stroke, and transient ischemic attack	NA	NA	NA	0.69	0.659155480316844	0.719242159077842	0.0153425536135849	0.609537911
142	Rana	2016	Journal of the American College of Cardiology	PCE women	Existing registry	2008	2008	2013	Kaiser Permanente Northern California	United States	North America	Multicenter	40	75	Comparable - within 5 yrs	2	1	0	0		0	1	1	NA	5	<10 year	NA	8.75	NA	NA	NA	NA	NA	NA	0	NA	NA	189511	NA	Fatal or nonfatal CVD	acute myocardial infarction, coronary heart disease (CHD) death, or fatal or nonfatal ischemic stroke	NA	NA	NA	0.72	2.57084424176616e-05	0.99999611190998	1.18420735076571	NA
144	Sussman	2017	Medical Care	PCE women	Existing registry	2006	2007	2011	US Department of Veterans Affairs	United States	North America	Multicenter	45	80	Comparable - within 5 yrs	2	0	0	0		0	0	0	NA	5	<10 year	55.6	7.4	131.1	15.6	54.55	14.93	201.7	35.3	0	25.3	15.7	76155	1599	Fatal or nonfatal CVD	Hard CVD events included the first occurrence of nonfatal myocardial infarction, Coronary Heart Disease death, fatal or nonfatal stroke	NA	NA	NA	0.726	0.701863142768648	0.748881913338722	0.012	0.91396714389391
148	Yang	2016	Circulation	PCE women white	Existing cohort	1998	2001	2015	InterASIA and China MUCA (1998)	China	Asia	Population based	35	74	Comparable - within 5 yrs	2	0	0	0		0	0	0	NA	10	10 year	48.4	9.2	122.5	20.6	53.4	12.8	188.2	38.3	0	4.5	5.1	10986	285	Fatal or nonfatal CVD	nonfatal acute MI or CHD death or fatal or nonfatal stroke. Acute MI was identified as a change in biochemical markers of myocardial necrosis accompanied by ischemic symptoms, pathological Q waves, ST-segment elevation or depression, or coronary intervent	NA	NA	NA	0.783	0.754166194785738	0.809307018813017	0.0140677899401694	1.10230654761905
149	Yang	2016	Circulation	PCE women white	Existing cohort	1992	1994	2015	China MUCA (1992)	China	Asia	Population based	35	59	Narrower	2	0	0	0		0	0	0	NA	10	10 year	46.6	7.4	122.5	20.2	52.1	13.3	177	38.2	0	7.6	3.5	7558	168	Fatal or nonfatal CVD	nonfatal acute MI or CHD death or fatal or nonfatal stroke. Acute MI was identified as a change in biochemical markers of myocardial necrosis accompanied by ischemic symptoms, pathological Q waves, ST-segment elevation or depression, or coronary intervent	NA	NA	NA	0.786	0.749783336167202	0.818245341548222	0.0174660712717159	1.36842105263158
150	Yang	2016	Circulation	PCE women white	Existing cohort	2007	2008	2015	CIMIC	China	Asia	Population based	16	99	Broader	2	0	0	0		0	0	0	NA	5	<10 year	53.9	10.2	130.3	22.4	51.7	12.3	176.5	34	0	1.6	6.7	43966	738	Fatal or nonfatal CVD	nonfatal acute MI or CHD death or fatal or nonfatal stroke. Acute MI was identified as a change in biochemical markers of myocardial necrosis accompanied by ischemic symptoms, pathological Q waves, ST-segment elevation or depression, or coronary intervent	NA	NA	NA	0.785	0.770100737574631	0.799185464830989	0.00741969161911685	1.10952526689272
154	Yang	2016	Circulation	PCE women African American	Existing cohort	1998	2001	2015	InterASIA and China MUCA (1998)	China	Asia	Population based	35	74	Comparable - within 5 yrs	2	0	0	0		0	0	0	NA	10	10 year	48.4	9.2	122.5	20.6	53.4	12.8	188.2	38.3	0	4.5	5.1	10986	285	Fatal or nonfatal CVD	nonfatal acute MI or CHD death or fatal or nonfatal stroke. Acute MI was identified as a change in biochemical markers of myocardial necrosis accompanied by ischemic symptoms, pathological Q waves, ST-segment elevation or depression, or coronary intervent	NA	NA	NA	0.796	0.769143464249609	0.820461502271279	0.0130899847286373	0.715009652509653
155	Yang	2016	Circulation	PCE women African American	Existing cohort	1992	1994	2015	China MUCA (1992)	China	Asia	Population based	35	59	Narrower	2	0	0	0		0	0	0	NA	10	10 year	46.6	7.4	122.5	20.2	52.1	13.3	177	38.2	0	7.6	3.5	7558	168	Fatal or nonfatal CVD	nonfatal acute MI or CHD death or fatal or nonfatal stroke. Acute MI was identified as a change in biochemical markers of myocardial necrosis accompanied by ischemic symptoms, pathological Q waves, ST-segment elevation or depression, or coronary intervent	NA	NA	NA	0.807	0.772697835114371	0.837216164578792	0.0164512519260244	0.793893129770992
156	Yang	2016	Circulation	PCE women African American	Existing cohort	2007	2008	2015	CIMIC	China	Asia	Population based	16	99	Broader	2	0	0	0		0	0	0	NA	5	<10 year	53.9	10.2	130.3	22.4	51.7	12.3	176.5	34	0	1.6	6.7	43966	738	Fatal or nonfatal CVD	nonfatal acute MI or CHD death or fatal or nonfatal stroke. Acute MI was identified as a change in biochemical markers of myocardial necrosis accompanied by ischemic symptoms, pathological Q waves, ST-segment elevation or depression, or coronary intervent	NA	NA	NA	0.792	0.777134189391839	0.806121598411885	0.00739463921986484	0.698843812781644
[truncated: 12 more columns]
